# Supplementary material for: geneBasis: an iterative approach for unsupervised selection of targeted gene panels from scRNA-seq
Source: PubMed Central journal article supplement (PMC8650258; doi:10.1186/s13059-021-02548-z), 2021-12-06
Supplement: 13059_2021_2548_MOESM1_ESM.pdf [file 13059_2021_2548_MOESM1_ESM.pdf]

# Fig. S1

For each cell (in black):

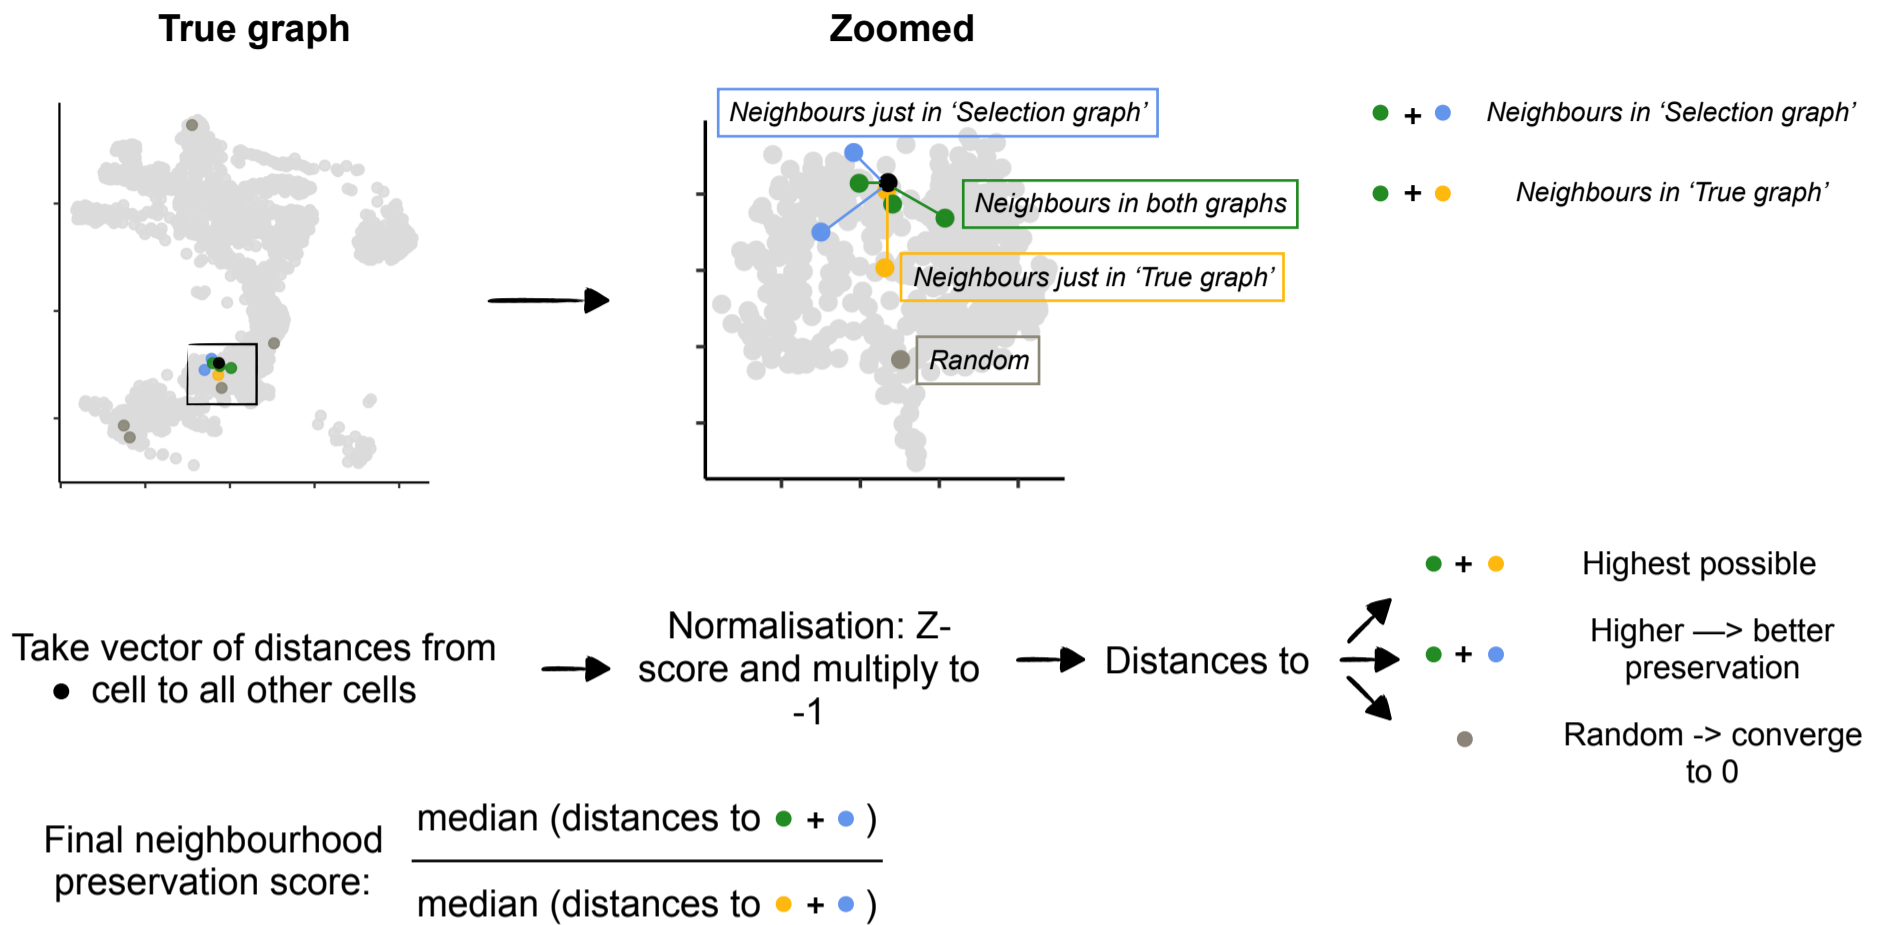

**Fig. S1. Schematic visualisation for cell neighbourhood preservation score workflow.** For each cell (in black) we detect neighbours from the True graph and from the Selection graph, and use the ratio of normalised distances as the final score.

# Fig. S2

## Cell neighbourhood preservation

### A

Mouse embryo

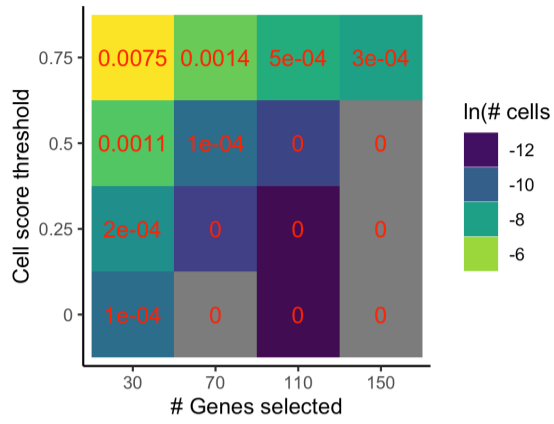

## Gene prediction

### B

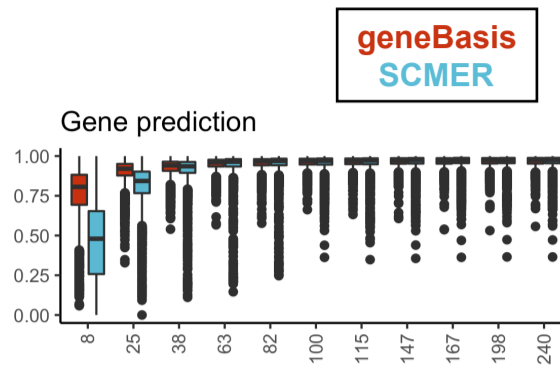

### C

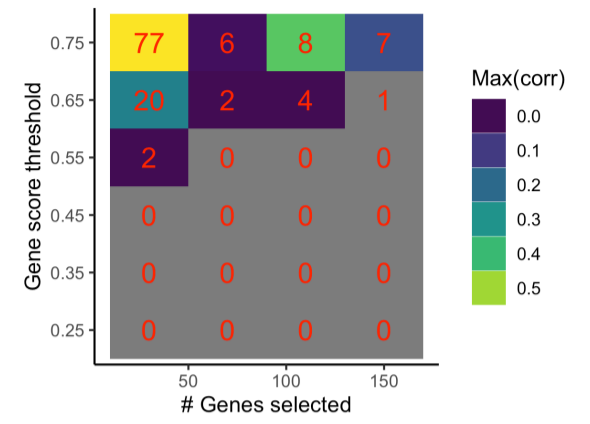

Spleen

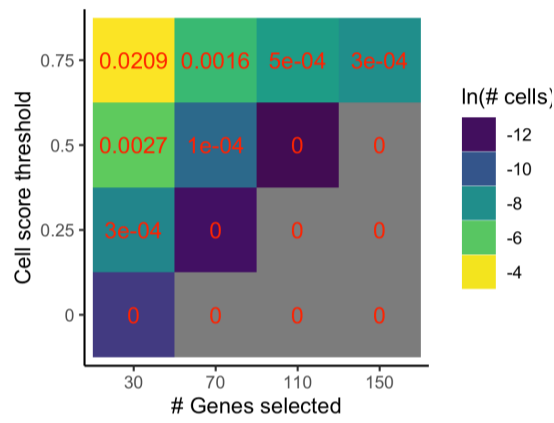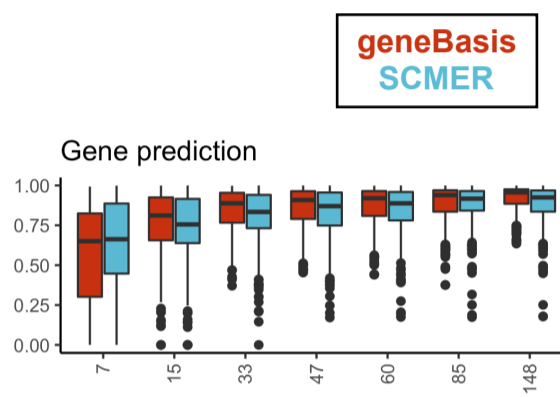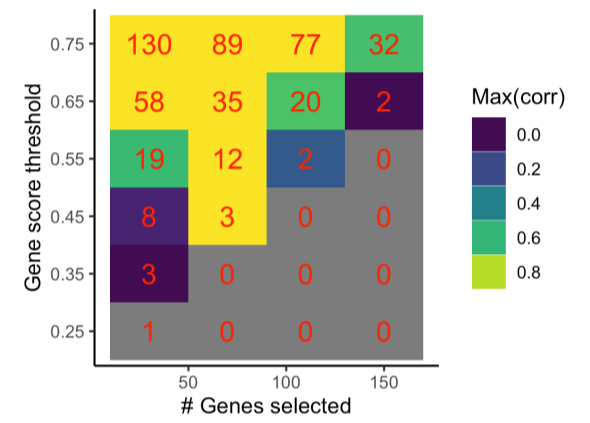

Pancreas

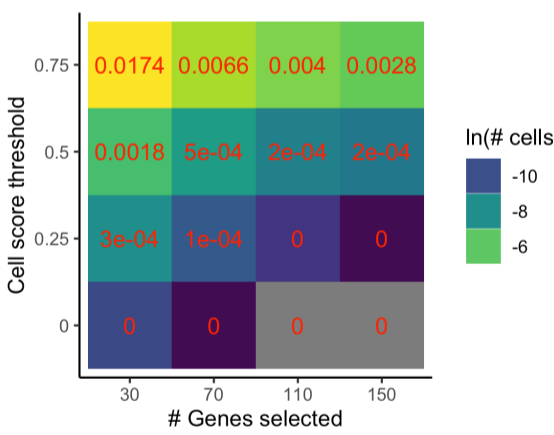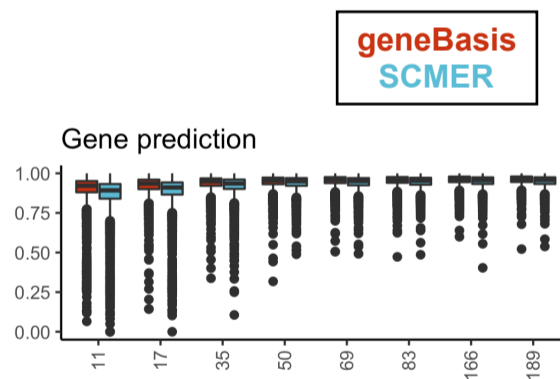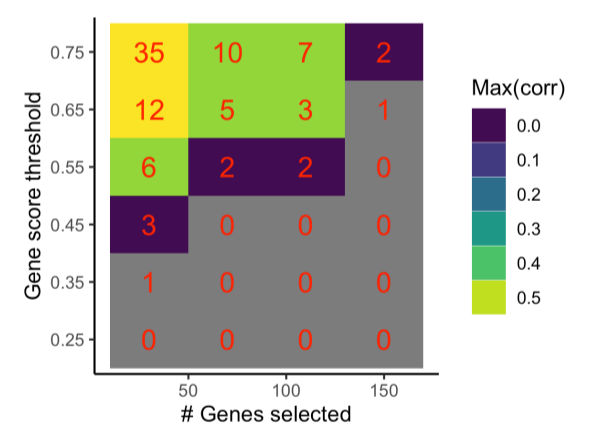

Melanoma

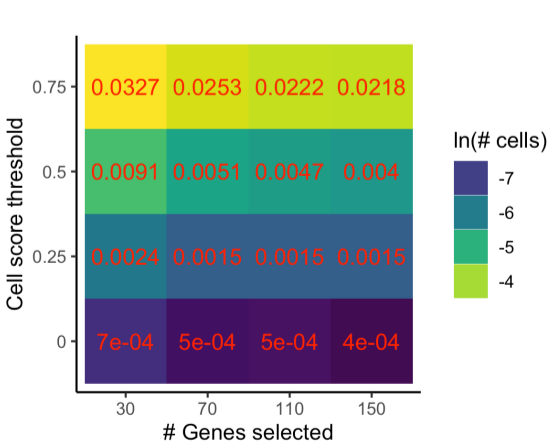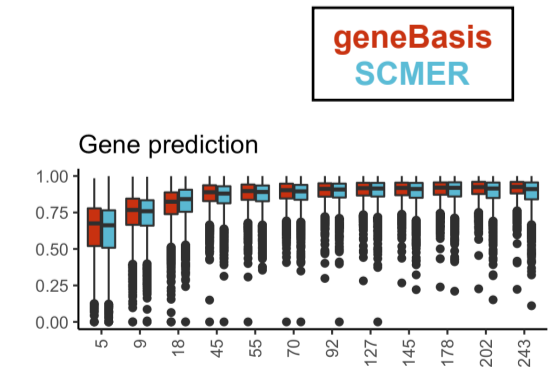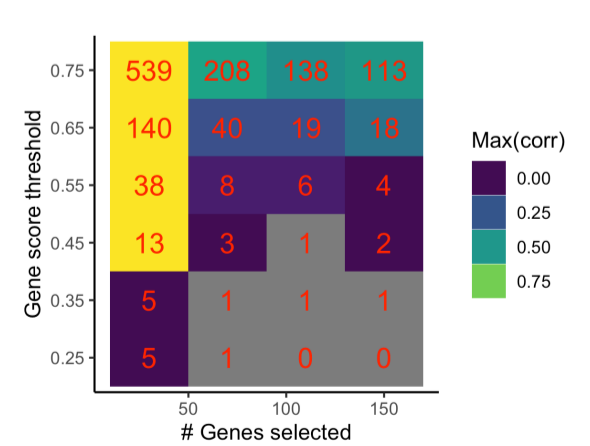

**Fig. S2. Systematic assessment of the ‘completeness’ of the generated gene panels.** We provide several semi-orthogonal metrics to evaluate how complete the current panel is. Analysis is performed for each dataset (in rows).

- (A) Heatmap represents the fraction of cells that have low neighbourhood preservation score - as a function of number of genes (X-axis) and threshold for neighbourhood preservation score (Y-axis). Colours are log-scaled to facilitate visualization. Numbers inside correspond to actual values.
- (B) Distribution of gene prediction score as a function of the gene panel size. Colours correspond to different methods.
- (C) Heatmap represents statistics regarding gene prediction score - as a function of number of genes (X-axis) and threshold for gene prediction score (Y-axis). Numbers inside correspond to the number of genes that show a gene prediction score lower than the corresponding threshold. Colours correspond to maximum across correlations for all pairwise comparisons between genes with low gene prediction scores. Colours are log-scaled to facilitate visualisation.

# Fig. S3

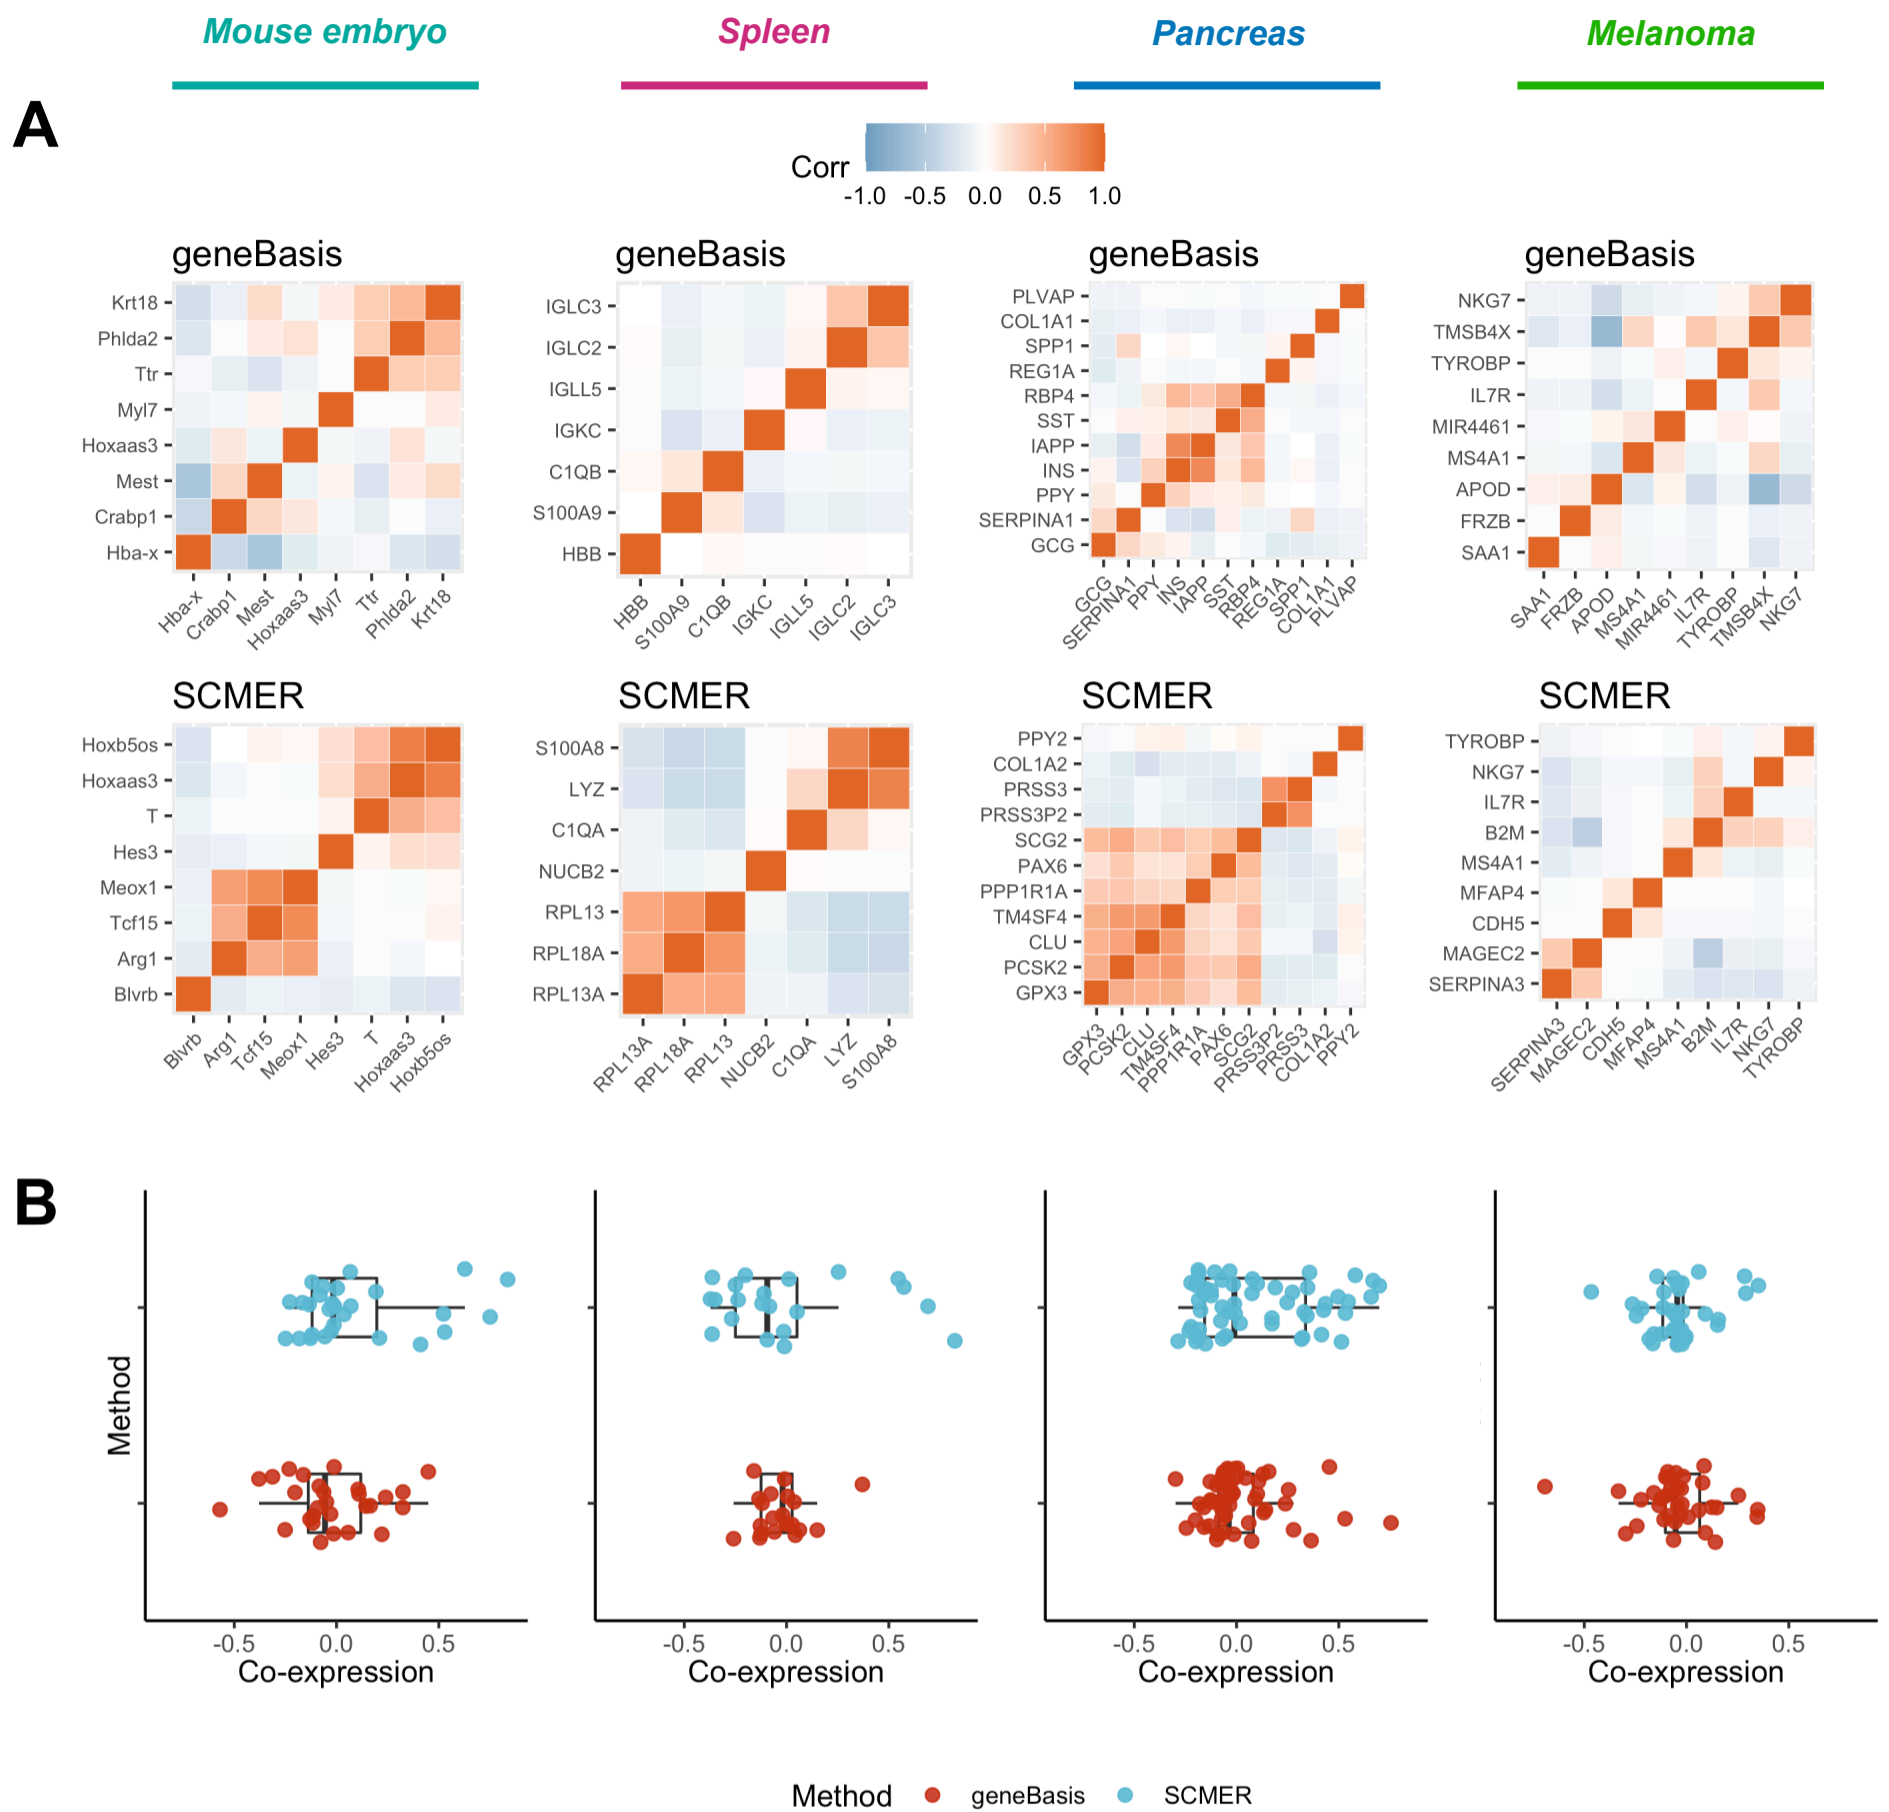

**Fig. S3. SCMER introduces redundancy in the selections when selecting a small number of genes.**

(A) Heatmaps showing the co-expression (Spearman correlation) between genes selected by geneBasis and SCMER. The overall degree of co-expression is lower for geneBasis compared to SCMER, and this is consistent for all benchmarked datasets.

(B) Boxplots represent pairwise correlation in log-normalized expression values (Y-axis) for the first genes selected for geneBasis (red) and SCMER (light blue).



# Fig. S4

## Initial selection

## Initial selection + geneBasis

### A

### Mouse embryo

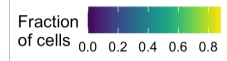

14 genes

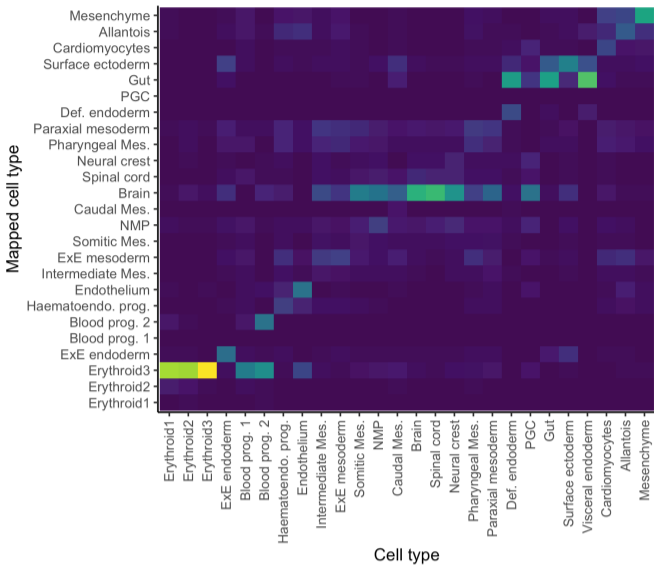

20 genes

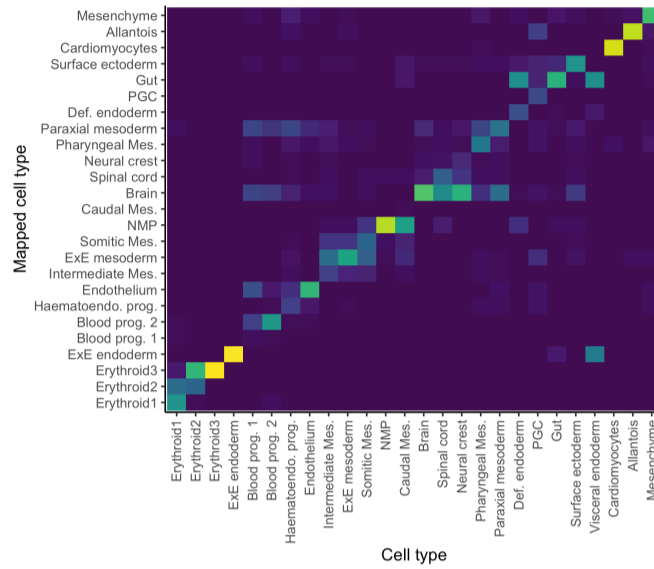

26 genes

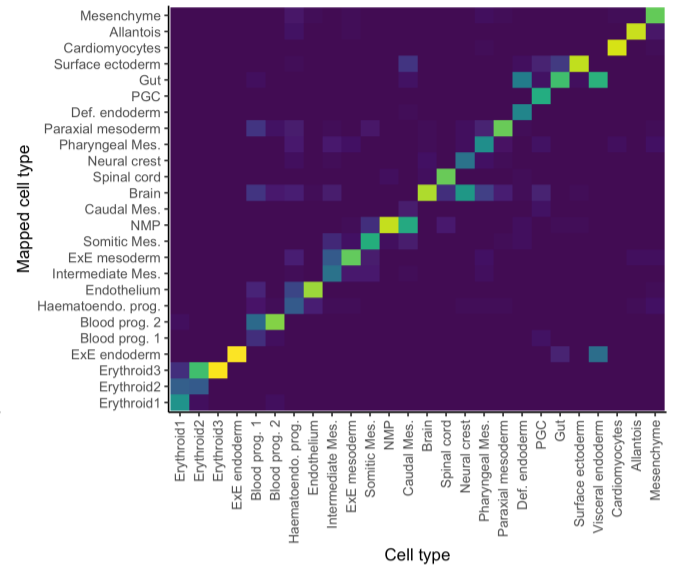

### B

### Spleen

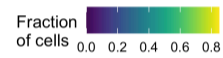

9 genes

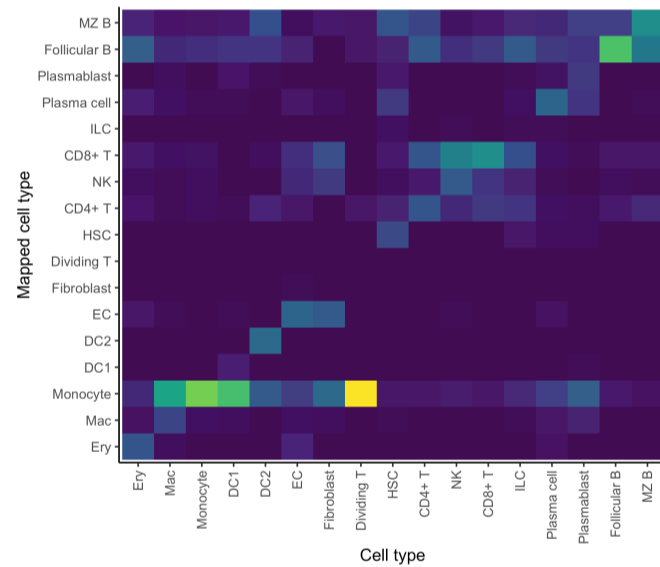

21 genes

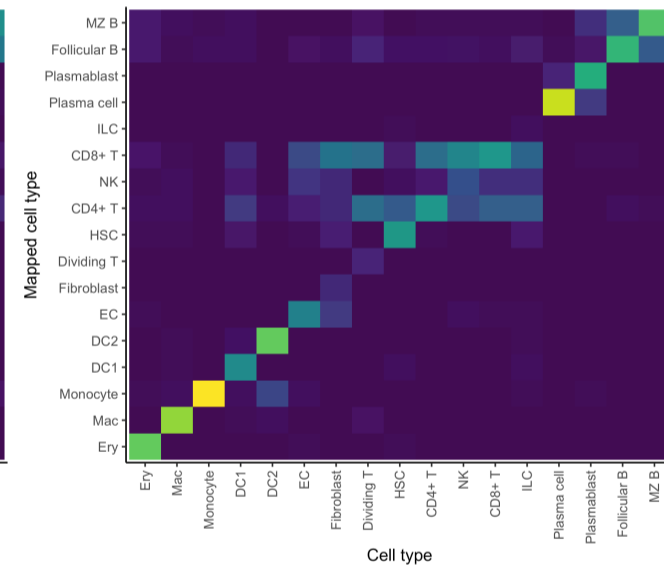

33 genes

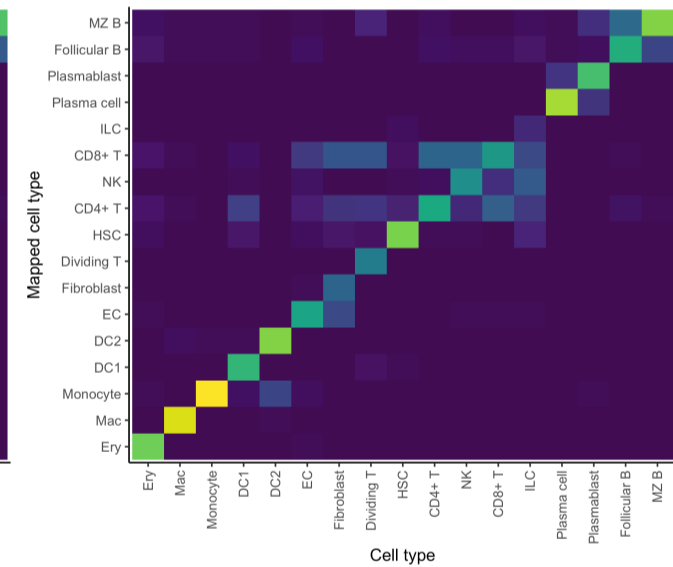

### C

### Pancreas

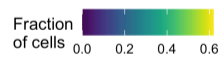

8 genes

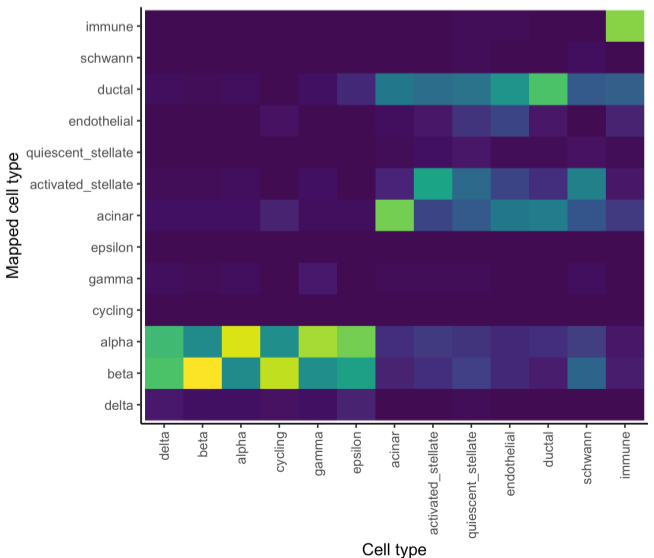

14 genes

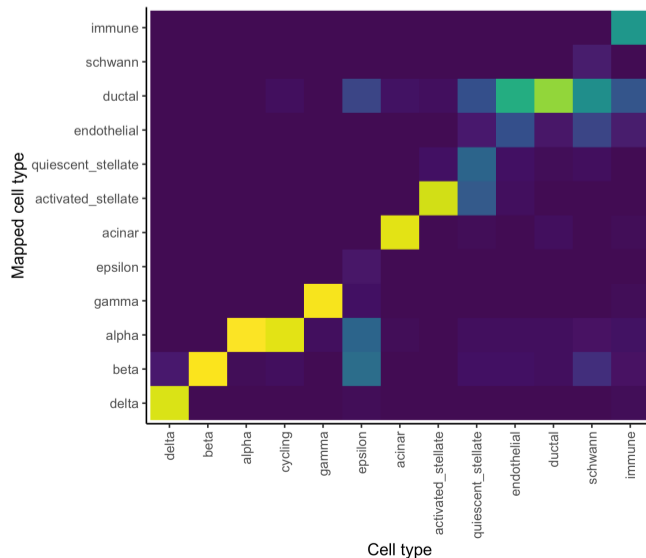

20 genes

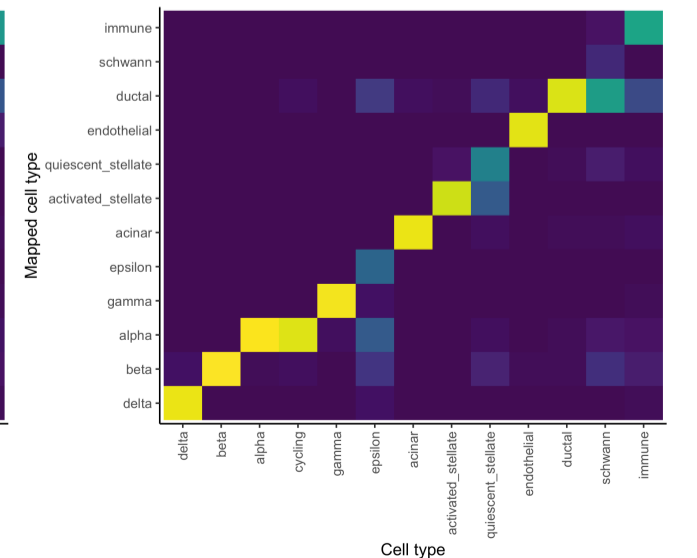

**Fig. S4. geneBasis is robust to initial selections and quickly finds missing sources of variation.**

- (A) Mouse embryo. Celltype confusion matrices for the initial semi-random selection (left), for the updated selection with 6 additional genes (middle) and updated selection with 12 additional genes (right).
- (B) Spleen. Celltype confusion matrices for the initial semi-random selection (left), for the updated selection with 12 additional genes (middle) and updated selection with 24 additional genes (right).
- (C) Pancreas. Celltype confusion matrices for the initial semi-random selection (left), for the updated selection with 6 additional genes (middle) and updated selection with 12 additional genes (right).

# Fig S5

## A

A. Positive control

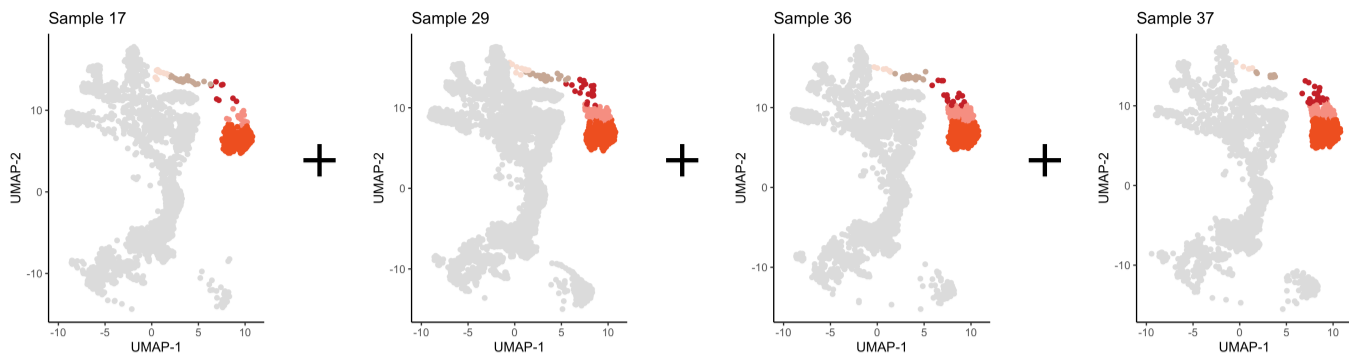

B. Blood lineage retained in 3 samples

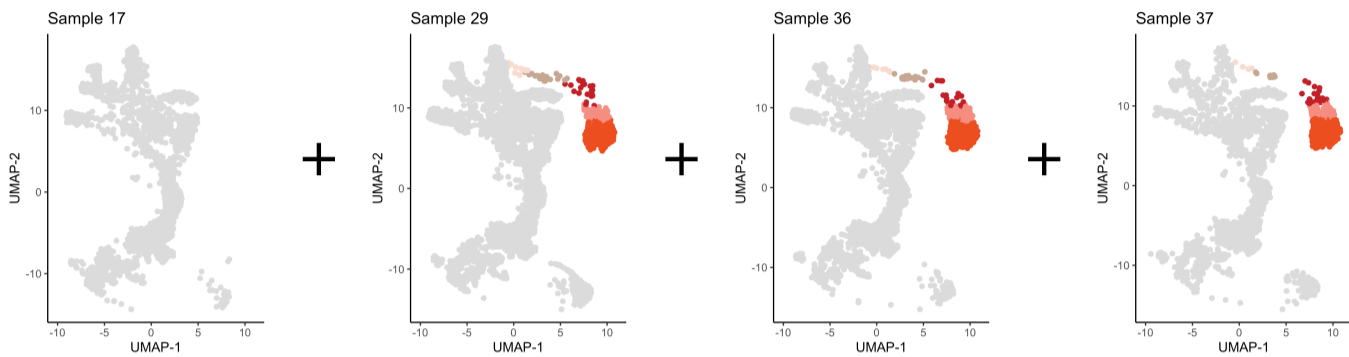

C. Blood lineage retained in 2 samples

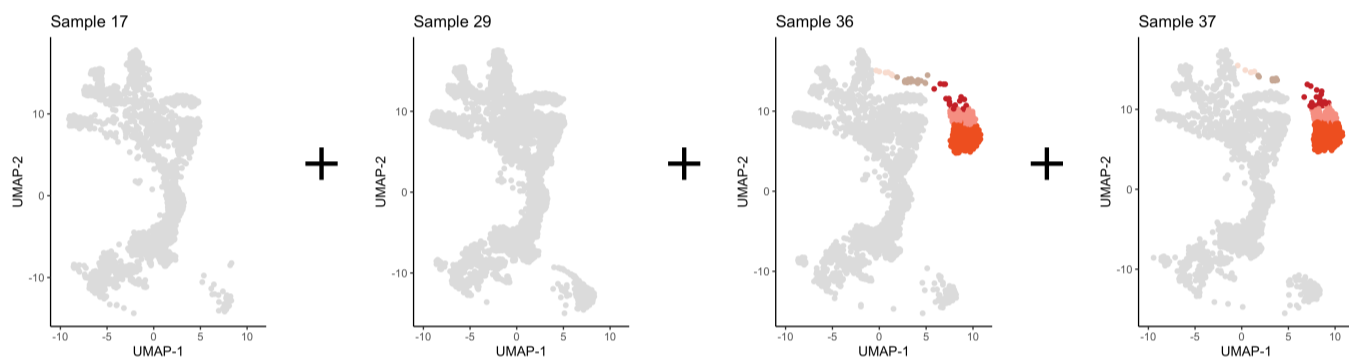

D. Blood lineage retained in 1 sample

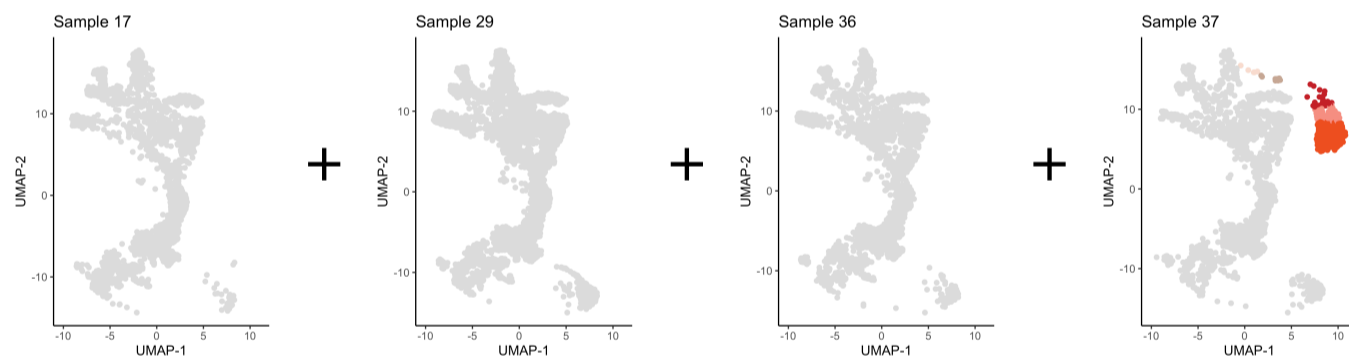

E. Negative Control

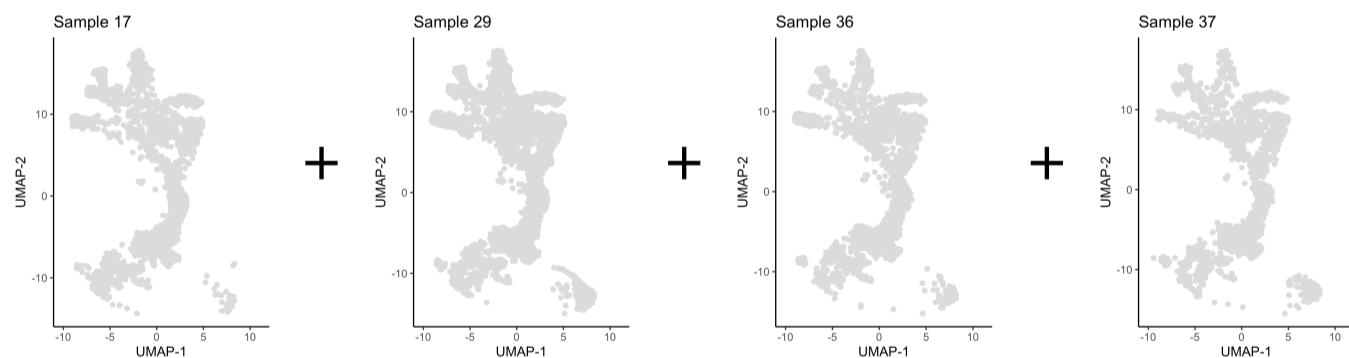

**Erythroid1**  
**Erythroid2**  
**Erythroid3**  
Blood progenitors 1  
Blood progenitors 2  
Rest

## B

|            | A | B | C | D | E |
|------------|---|---|---|---|---|
| gene Basis | + | + | + | + | - |
| SCMER      | + | + | + | - | - |

**+** At least one blood marker is selected  
**-** No blood markers are selected

## C

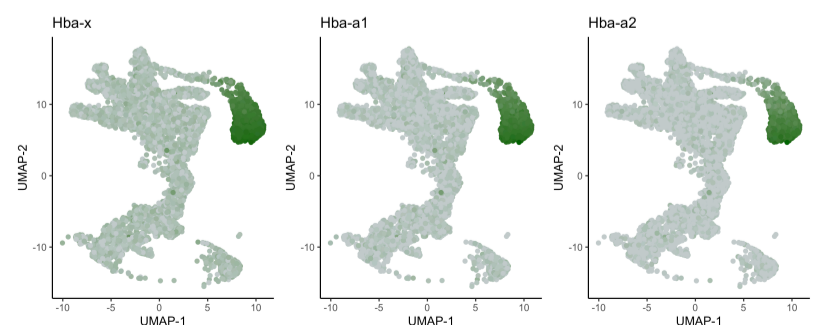

**Fig. S5. geneBasis accounts for batch effects even with highly unbalanced celltype composition.**

(A) Overview of the *in silico* experiment. Gene search was performed for 5 datasets (in rows), and inclusion of blood lineage for each sample (i.e. batch) is specified in columns.

(B) Table represents whether blood markers were selected for each dataset and method.

(C) UMAPs for mouse embryogenesis, coloured by expression of the selected blood marker genes.

**Fig. S6****A**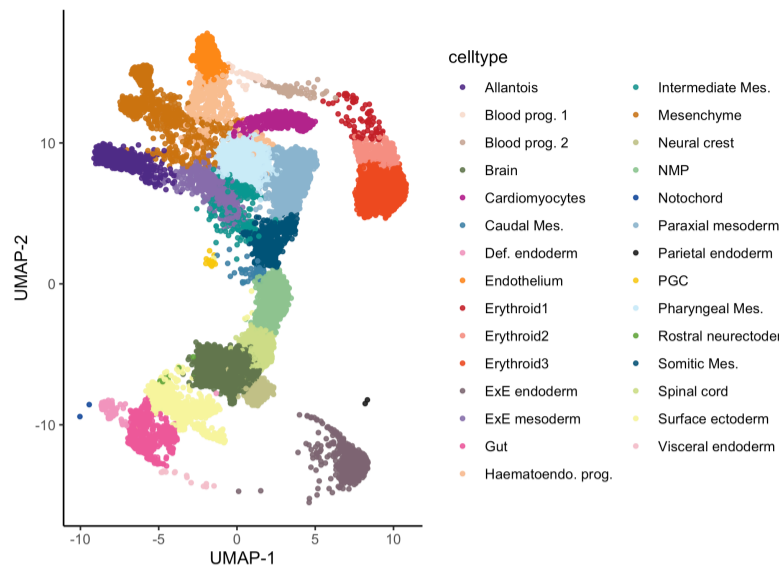**B**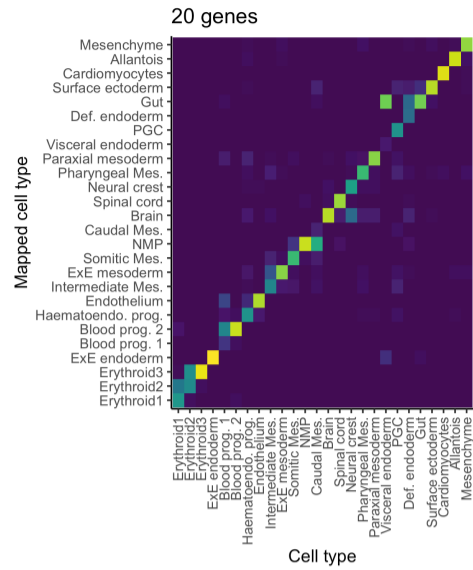**C**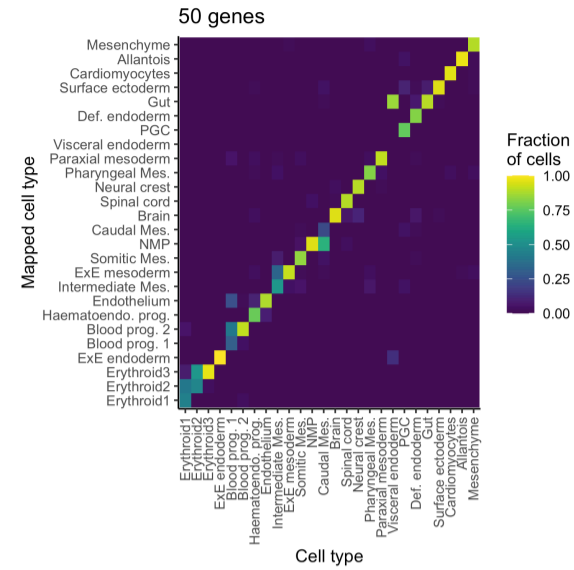**D****Gut VS Visceral Endoderm**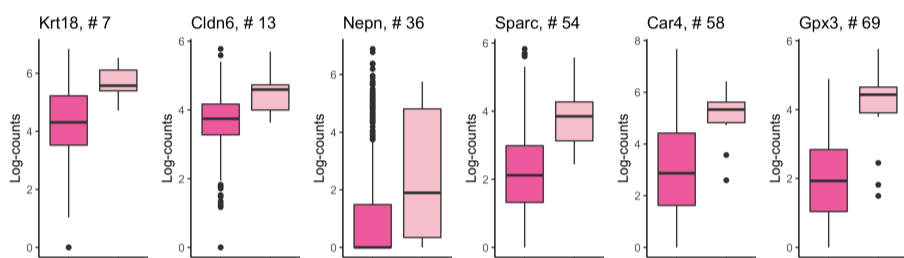**E****Caudal Mesoderm VS NMP**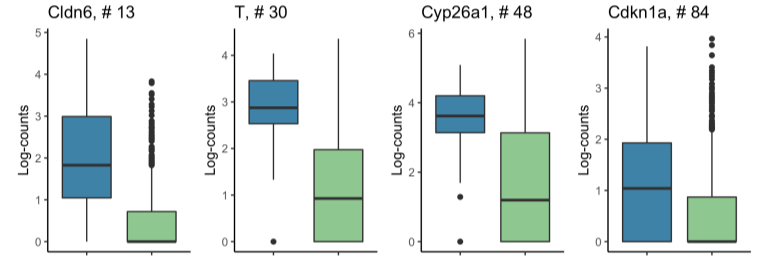**F****Cardiomyocytes**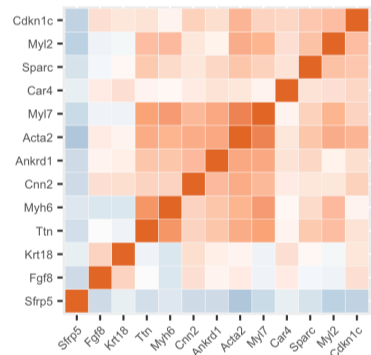**G**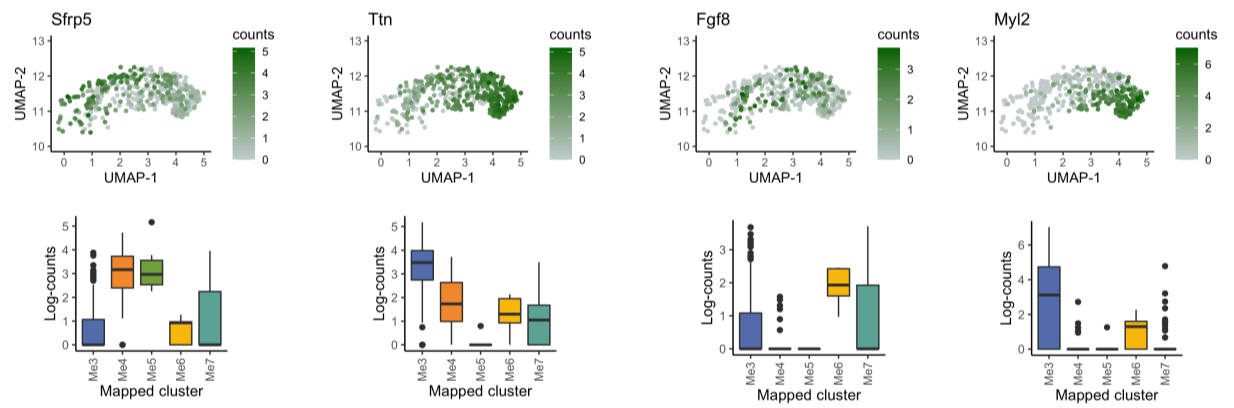**H****Gut**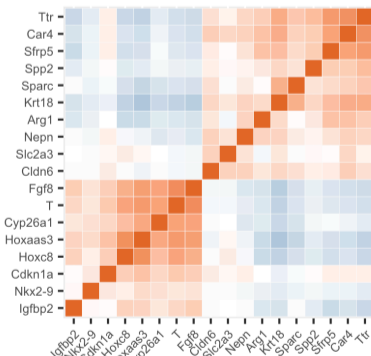**I**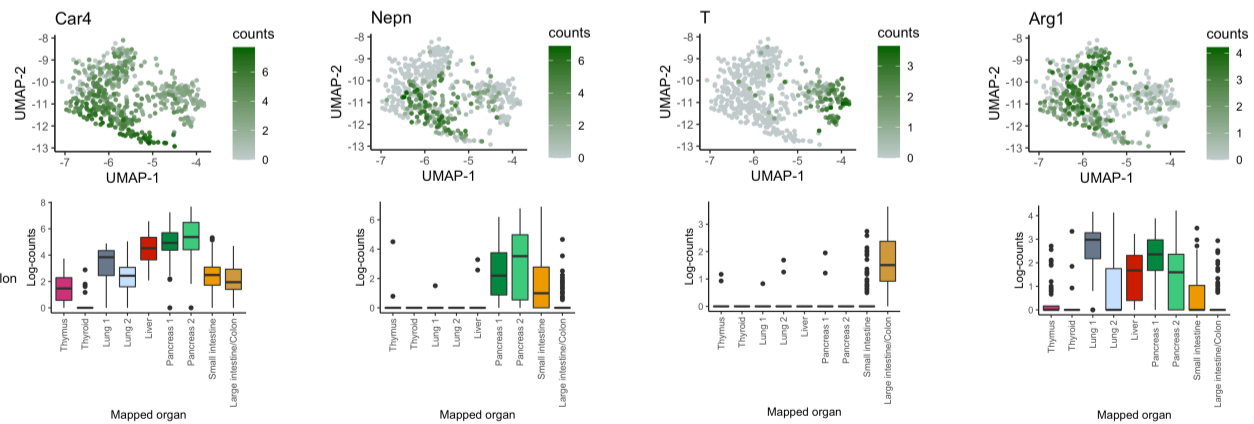**J****Cardiomyocytes, selection within the celltype**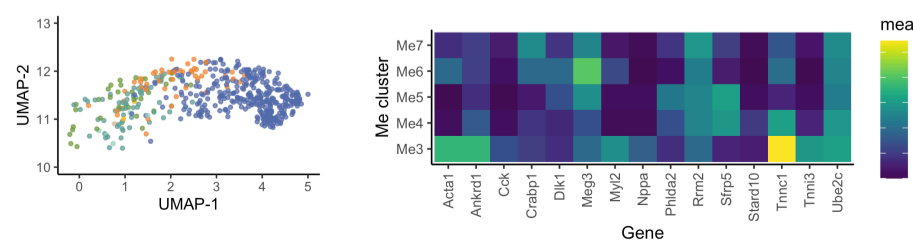**K****Gut, selection within the celltype**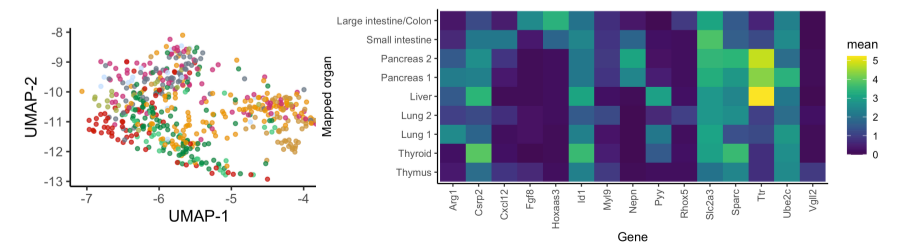

**Fig. S6. Detailed analysis of the gene selection for mouse embryogenesis.**

- (A) UMAP representation coloured by celltypes. Note that it duplicates part of Figure 2C and is introduced here solely to facilitate interpretation of the data.
- (B) Celltype confusion matrix for the first 20 selected genes.
- (C) Celltype confusion matrix for the first 50 selected genes.
- (D) Box Plots representing bulk log-normalised expression across celltypes for genes that are differentially expressed between Visceral endoderm and Gut.
- (E) Box Plots representing bulk log-normalised expression across celltypes for genes that are differentially expressed between Caudal mesoderm and NMP.
- (F) Co-expression (within Cardiomyocytes) of genes prioritised by geneBasis and differentially expressed in Cardiomyocytes.
- (G) For manually selected genes denoted as relevant to inter-cardiomyocytes heterogeneity: UMAP representation of Cardiomyocytes coloured by expression and box plots representing bulk log-normalised expression across mapped cardiac clusters.
- (H) Co-expression (within Gut cells) of genes prioritised by geneBasis and differentially expressed in Gut.
- (I) For manually selected genes denoted as relevant to inter-gut heterogeneity: UMAP representation of Gut cells colored by expression and box plots representing bulk log-normalised expression across mapped cardiac clusters.
- (J) Left panel: UMAP representation of Cardiomyocytes, coloured by mapped cardiac clusters, when integration between datasets was performed using the first 15 genes prioritised by geneBasis if performed directly on Cardiomyocytes. Right panel: Heatmap representing average expression for assigned (using mapping with all genes) cardiac cluster (Y-axis) for first 15 genes prioritised by geneBasis if performed directly on Cardiomyocytes.
- (K) Left panel: UMAP representation of Gut cells, coloured by mapped cardiac clusters, when integration between datasets was performed using first 15 genes prioritised by geneBasis if performed directly on Gut cells. Right panel: Heatmap representing average expression for assigned (using mapping with all genes) gut suborgan (Y-axis) for first 15 genes prioritised by geneBasis if performed directly on Gut cells.

**Fig. S7****Spleen****A**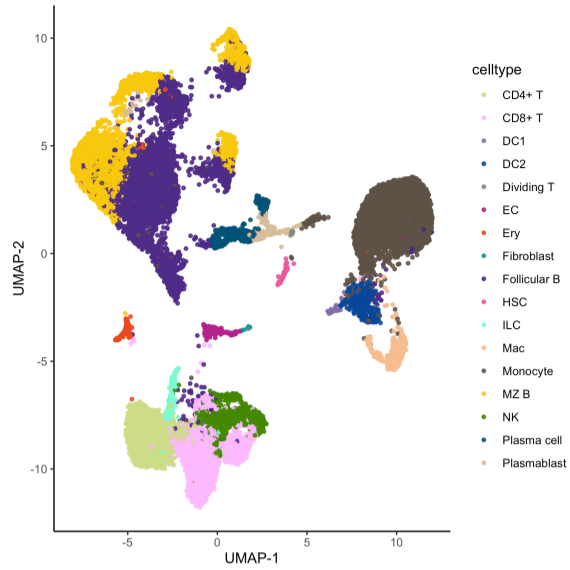**B**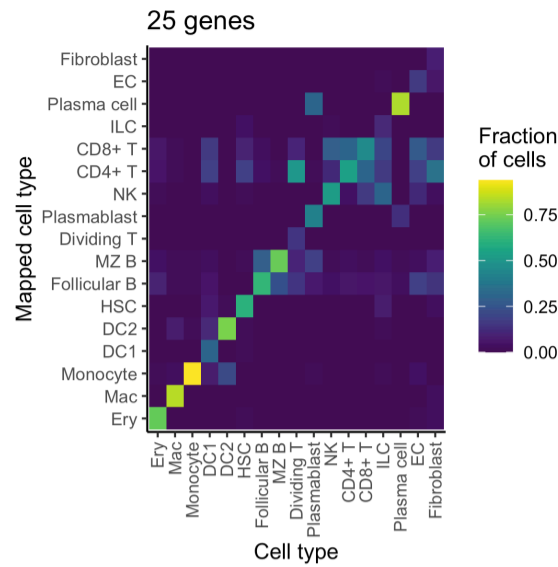**C**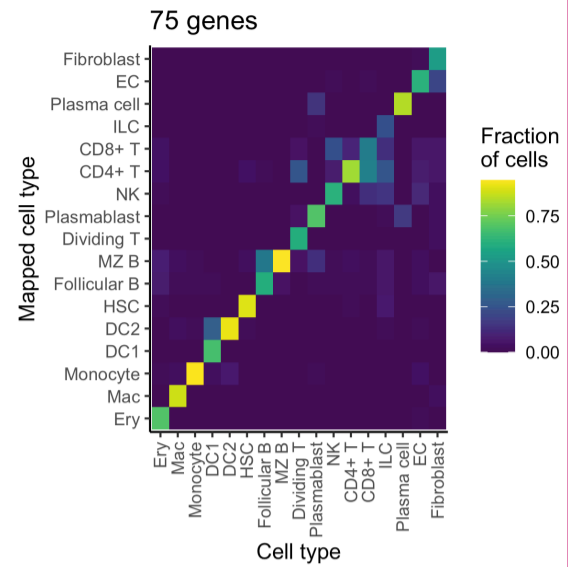**D**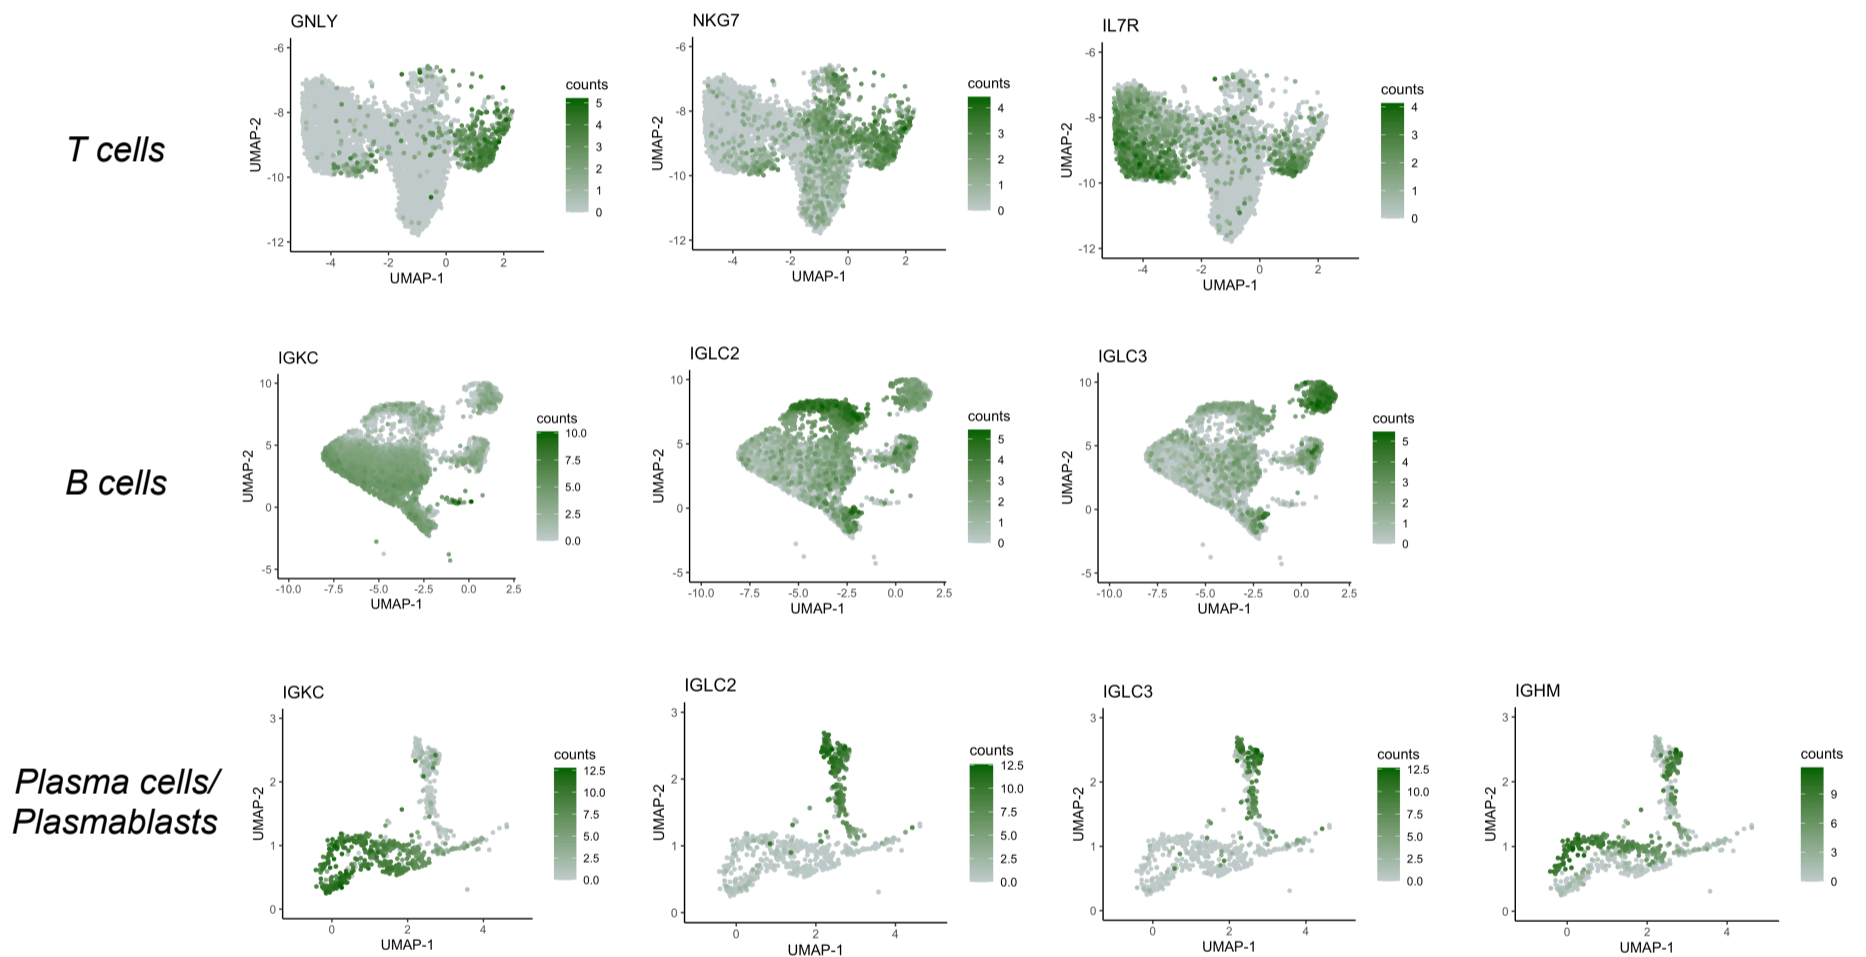**Pancreas****E**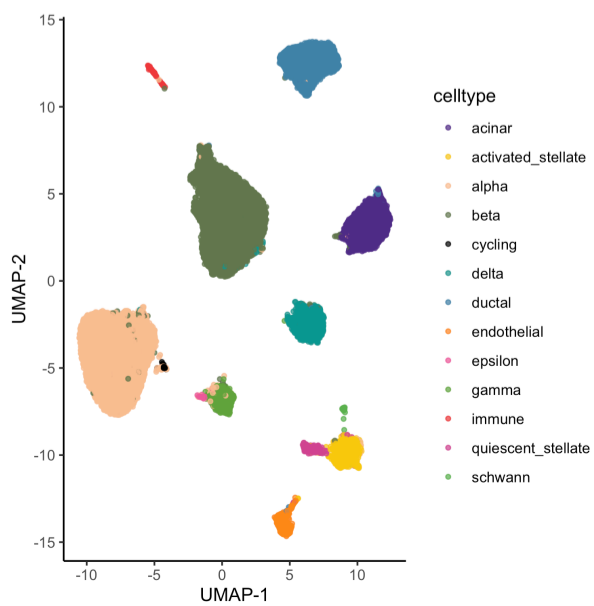**F**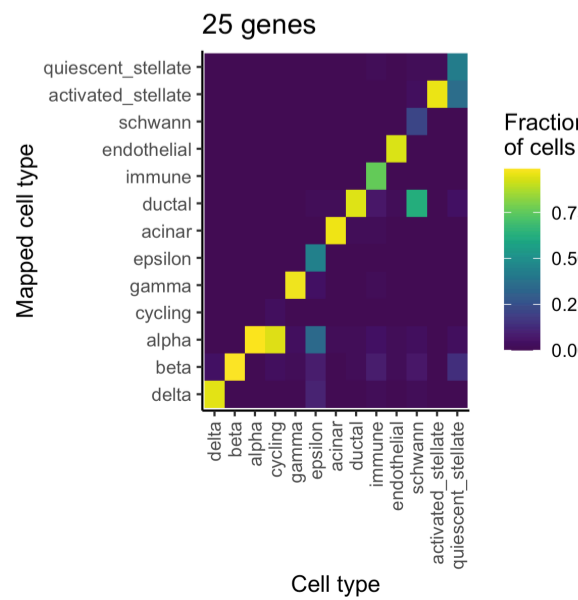**G**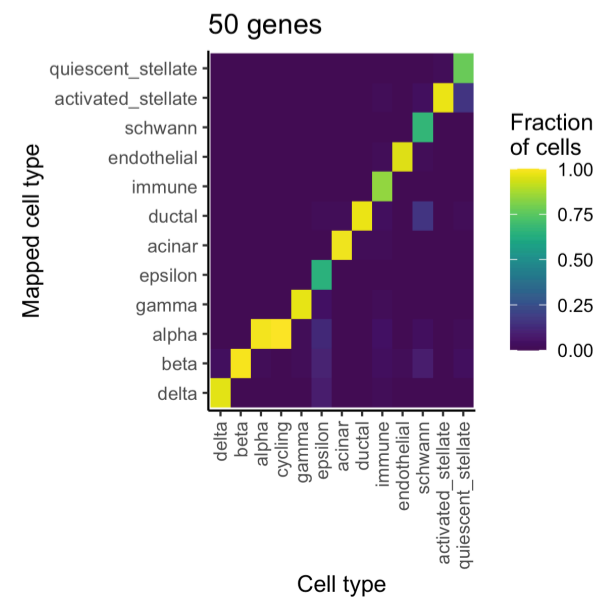

**Fig. S7. Detailed analysis of the selection for spleen and pancreas . Panels A-D correspond to spleen; panels E-G correspond to pancreas.**

(A) UMAP representation coloured by celltypes. Note that it duplicates part of Figure 2C and is introduced here solely to facilitate interpretation of the data.

(B) Celltype confusion matrix for 25 selected genes.

(C) Celltype confusion matrix for the first 75 selected genes.

(D) UMAP representation of T cells (Upper panel), B cells (Middle panel) and Plasma cells and Plasmablasts (Lower panel), colored by genes relevant for inter-celltype variability within corresponding celltypes.

(E) UMAP representation colored by celltypes. Note that it duplicates part of Figure 2C and is introduced here solely to facilitate interpretation of the data.

(F) Celltype confusion matrix for 25 selected genes.

(G) Celltype confusion matrix for 50 selected genes.



# Fig. S8

## A

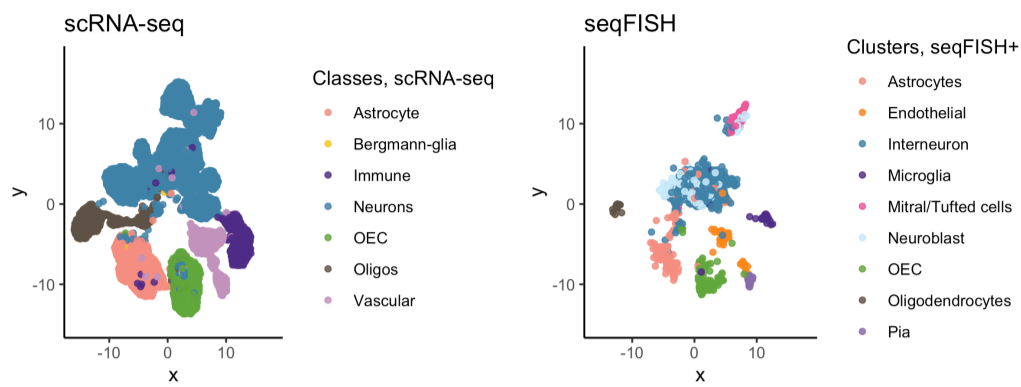

## B

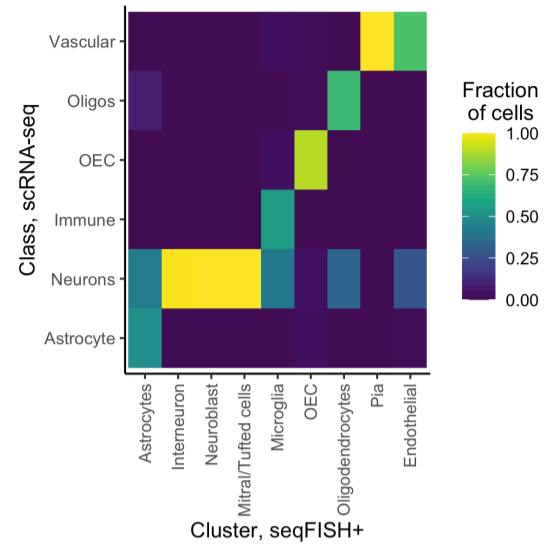

## C

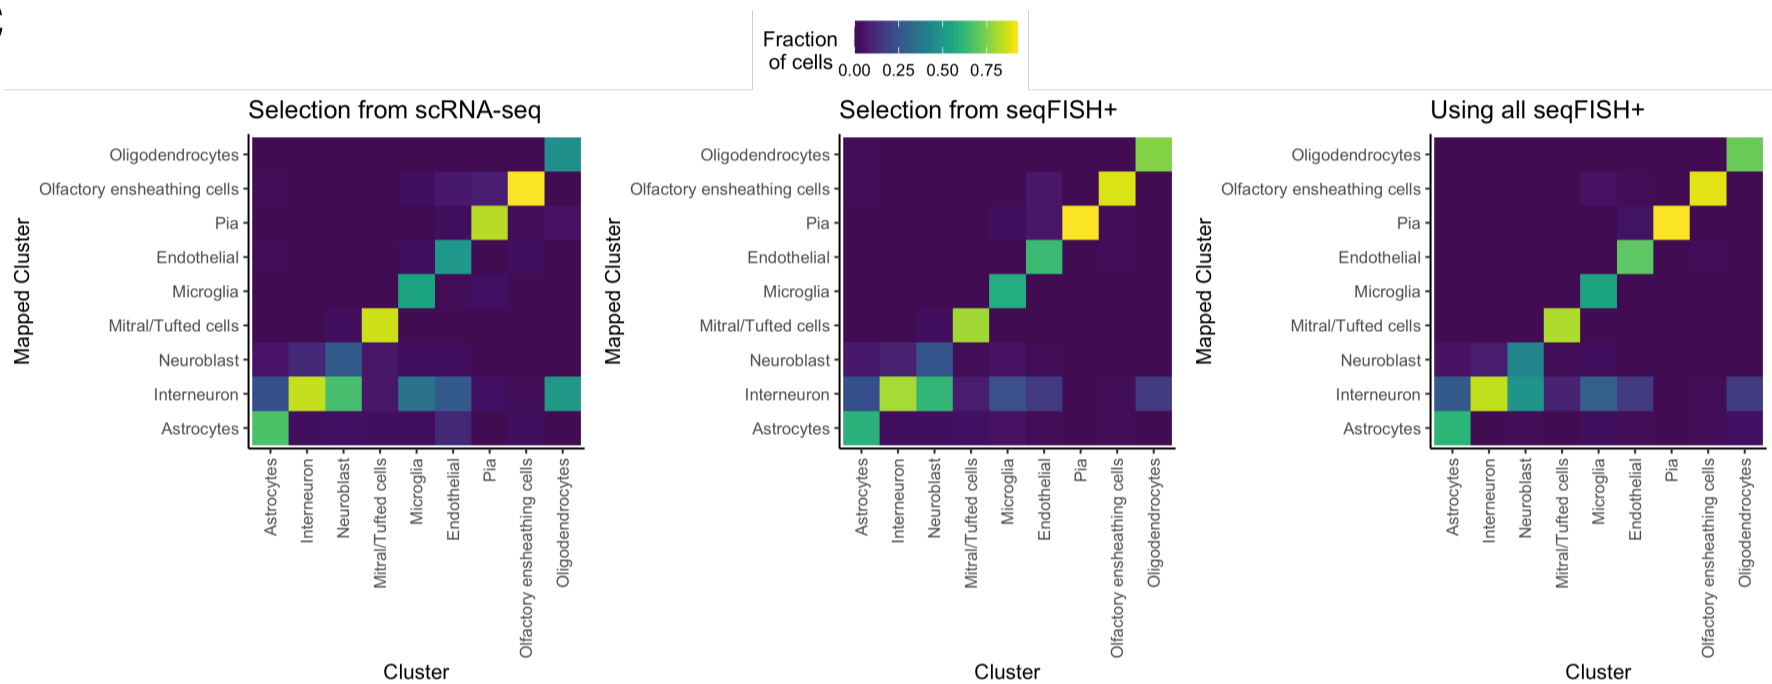

## D

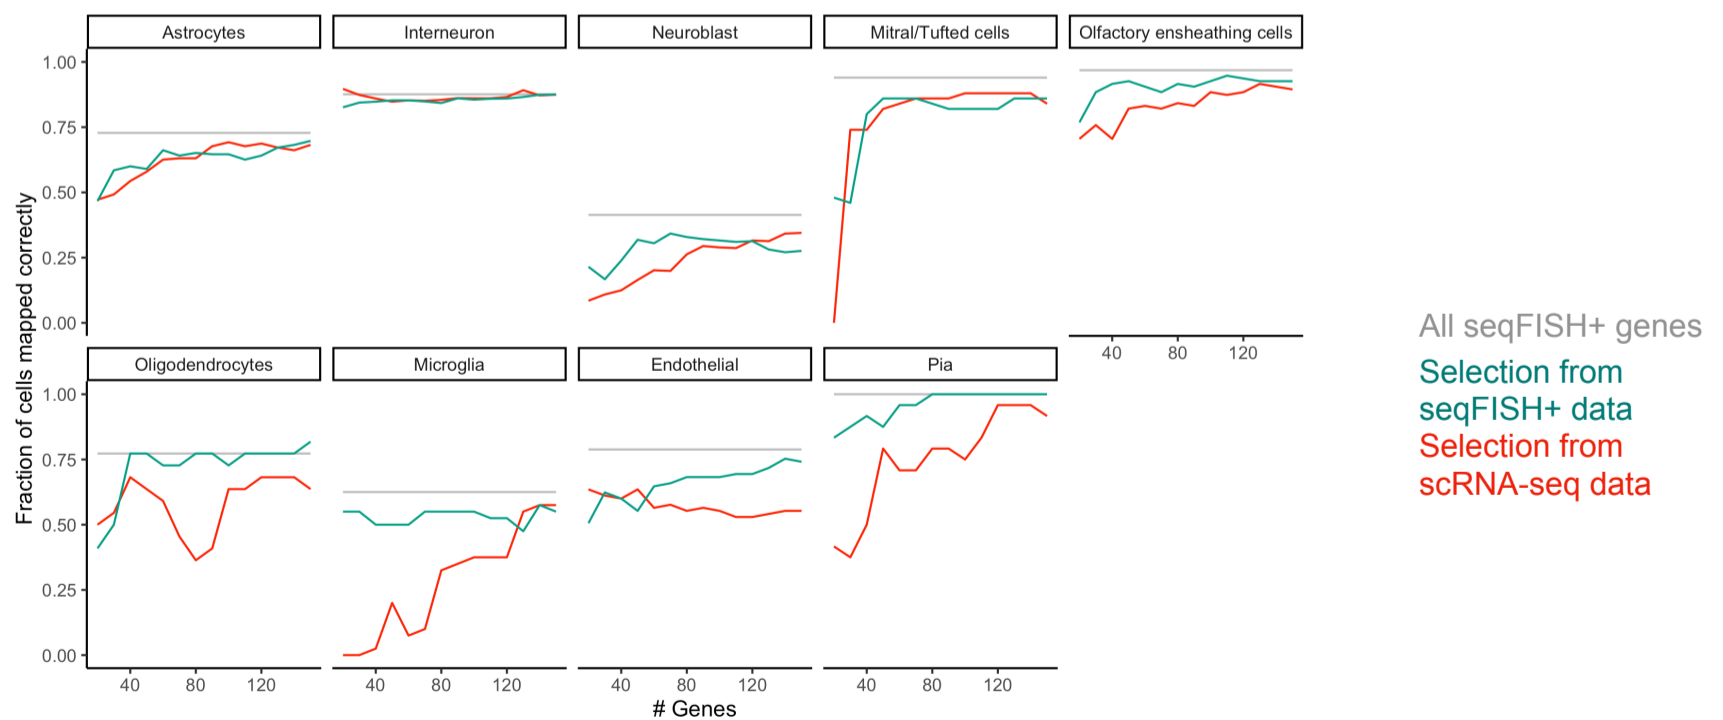

**Fig. S8. geneBasis selects genes that recover biological heterogeneity in seqFISH datasets.**

- (A) UMAP plots representing joint embedding for matched scRNA-seq (left) and seqFISH+ (right) of an olfactory bulb of a mouse. Colours correspond to respectively annotated cell types/clusters.
- (B) Heatmap representing confusion matrix for seqFISH+ cells between cluster originally assigned in seqFISH+ (X-axis) and mapped Class from scRNA-seq (Y-axis).
- (C) Heatmaps representing cell type mapping accuracy (for seqFISH+ data) for the selection of 150 genes derived from scRNA-seq (left); selection of 150 genes derived from seqFISH+ (center); all 10000 genes probed in seqFISH+.
- (D) Cell type mapping accuracy as a function of the number of genes in the panel. Each facet corresponds to the cluster from seqFISH+, colours correspond to the origins of the gene panel.

# Fig. S9

Mouse embryo

Spleen

Pancreas

Melanoma

## A Cell neighbourhood preservation score

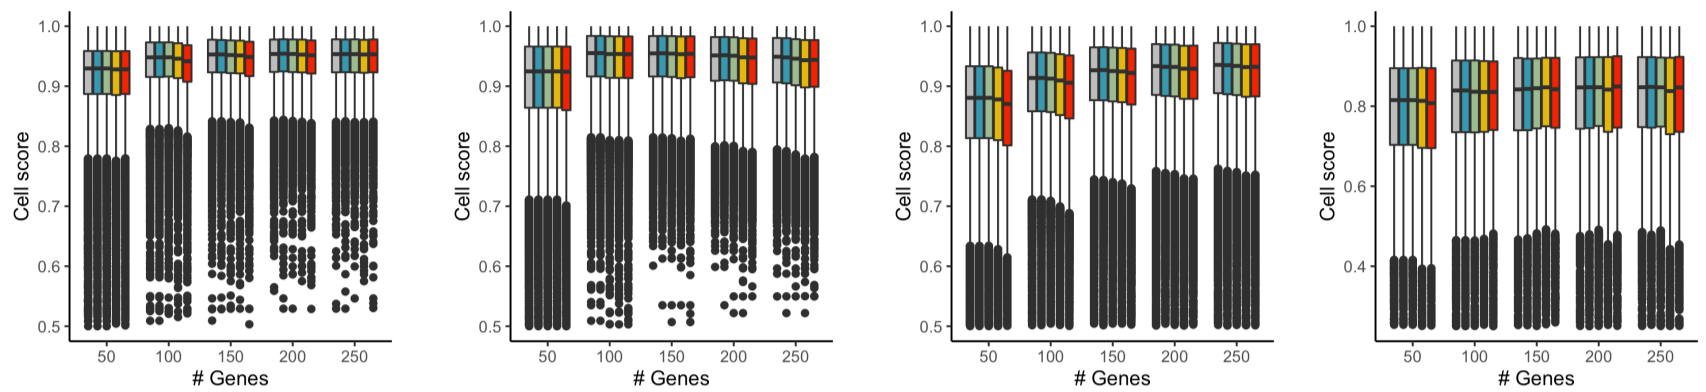

no PCA  
PCA, 100  
PCA, 50  
PCA, 25  
PCA, 10

## B Gene prediction score

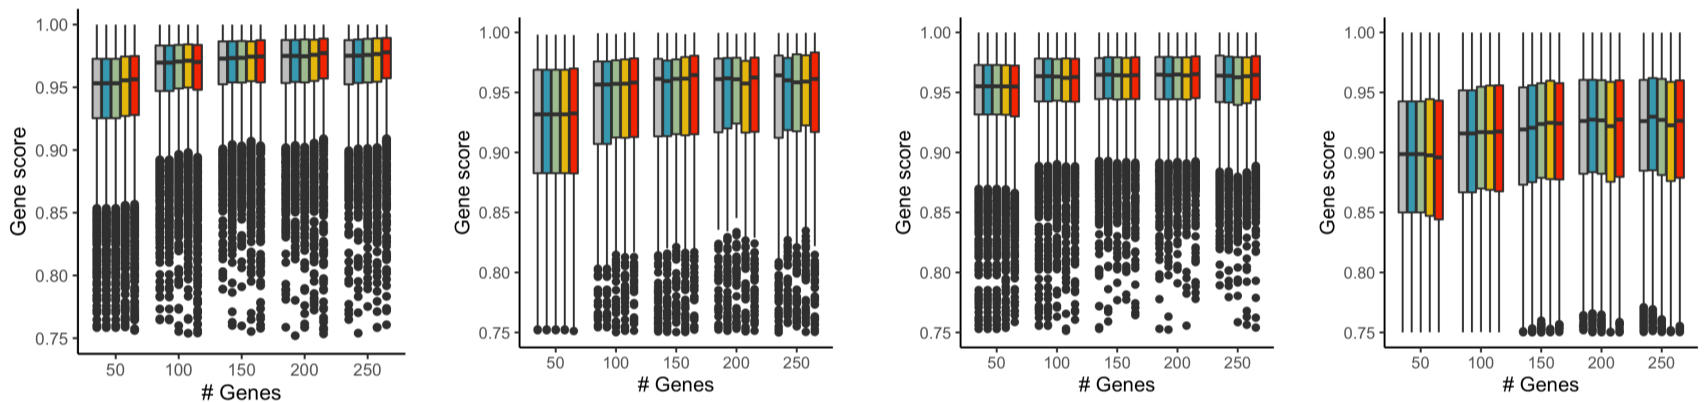

**Fig. S9. Performing PCA for mapping manifolds with selections does not change cell neighborhood preservation score or gene prediction score.**

(A) Box plots representing overall cell neighbourhood preservation score distribution as a function of the number of genes in the selections (X-axis) and optional PCA step with different number of components being selected + default no PCA (in colour).

(B) Box plots representing overall gene prediction score distribution as a function of number of genes in the selections (X-axis) and optional PCA step with different number of components being selected + default no PCA (in colour).

# Fig. S10

Mouse embryo

Spleen

Pancreas

Melanoma

## A Cell neighbourhood preservation score

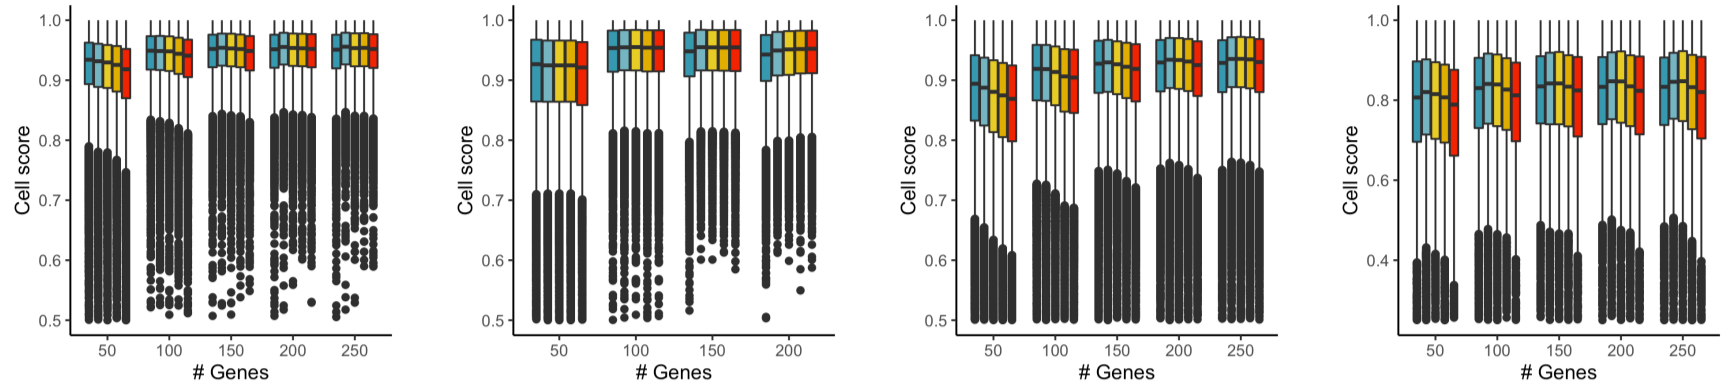

## B Gene prediction score

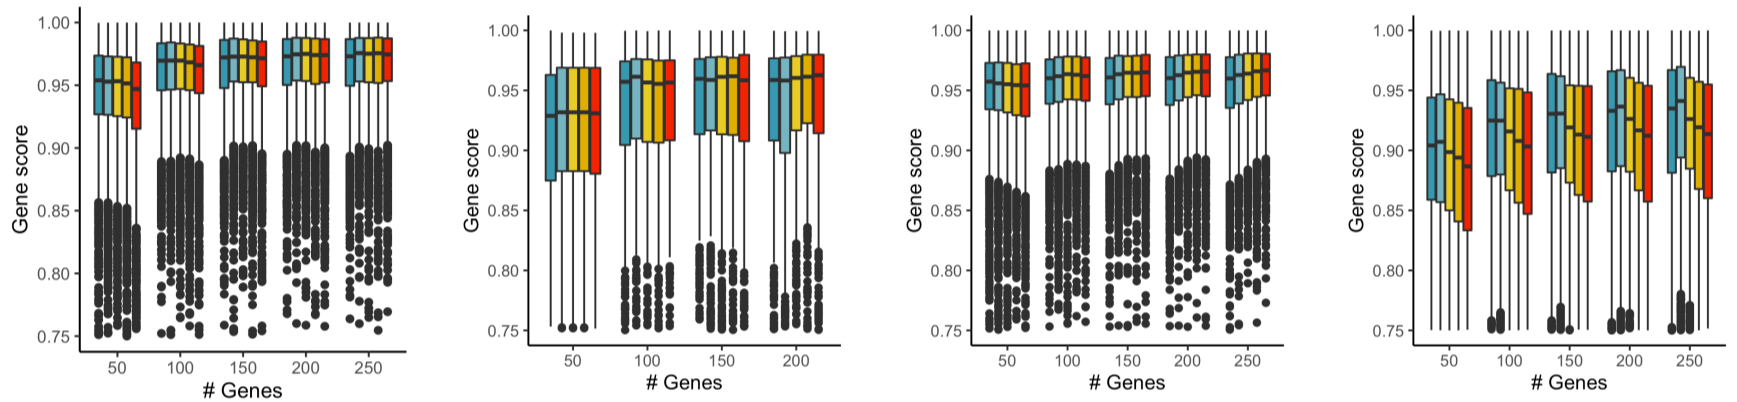

## C Inclusion of genes expressed in low number of cells

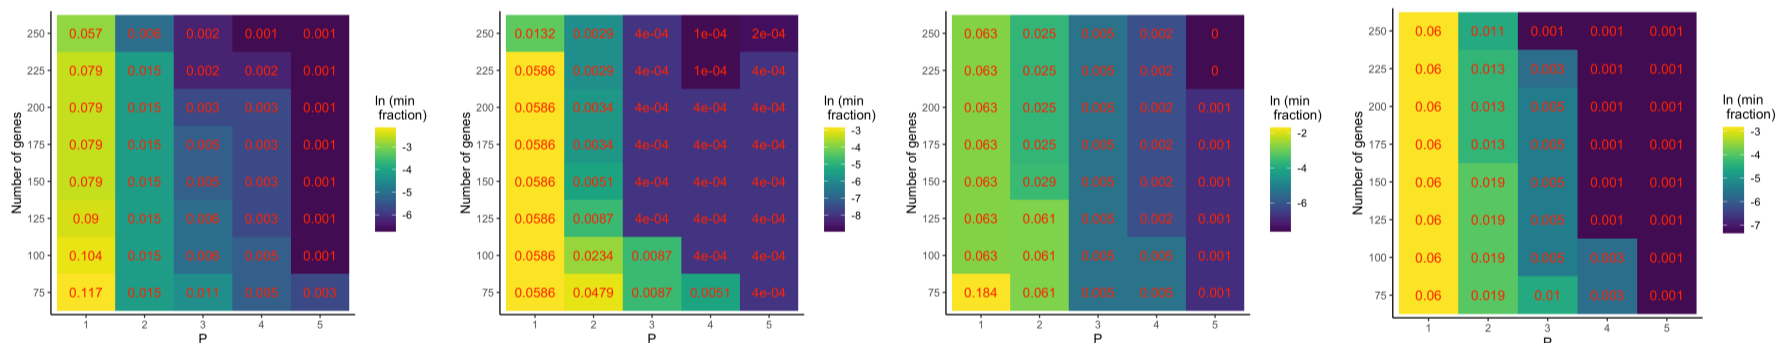

**Fig. S10. Minkowski distance of order  $p=3$  provides the resolution to select rare markers and genes expressed in a low fraction of cells.** Each column corresponds to a single dataset.

- (A) Box plots representing overall cell neighborhood preservation score distribution as a function of number of genes in the selections (X-axis) and different orders of Minkowski distance ( $p$ ) used for the algorithm (in colour).
- (B) Box plots representing overall gene prediction score distribution as a function of number of genes in the selections (X-axis) and  $p$  (orders of Minkowski distance) used for the algorithm (in colour).
- (C) Heatmaps representing the ability of a selection with the given order of Minkowski distance to prioritise lowly expressed genes. X-axis corresponds to the choice of  $p$ , Y-axis corresponds to number of genes in the selection, and both numbers (absolute scale) and colours (log scale) correspond to the minimum of expression levels (in the context fraction of cells with non-zero counts) across selected genes.
